# Supplementary material for: Versatile protein tagging in cells with split fluorescent protein
Source: PubMed Central journal article supplement (PMC4802074; doi:10.1038/ncomms11046), 2016-03-18
Supplement: ncomms11046-s1.pdf [file ncomms11046-s1.pdf]

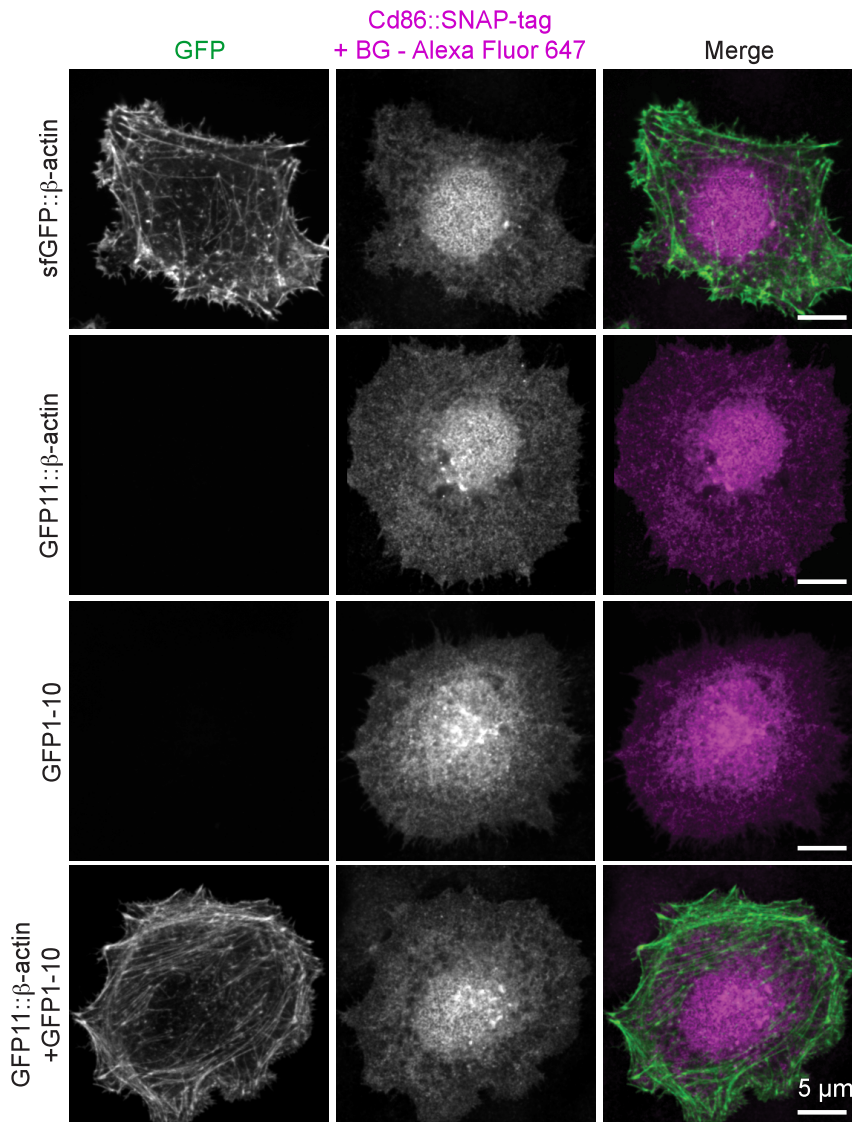

**Supplementary Figure 1:** Verification of GFP11 labeling, showing images of HeLa cells co-expressing GFP1-10 and GFP11:: $\beta$ -actin, compared to controls with either sfGFP:: $\beta$ -actin, GFP11:: $\beta$ -actin alone or GFP1-10 alone. CD86::SNAP-tag + benzylguanine (BG) - Alexa Fluor 647, which labels the plasma membrane, was used as a transfection marker. Scale bars indicate 5 $\mu$ m.

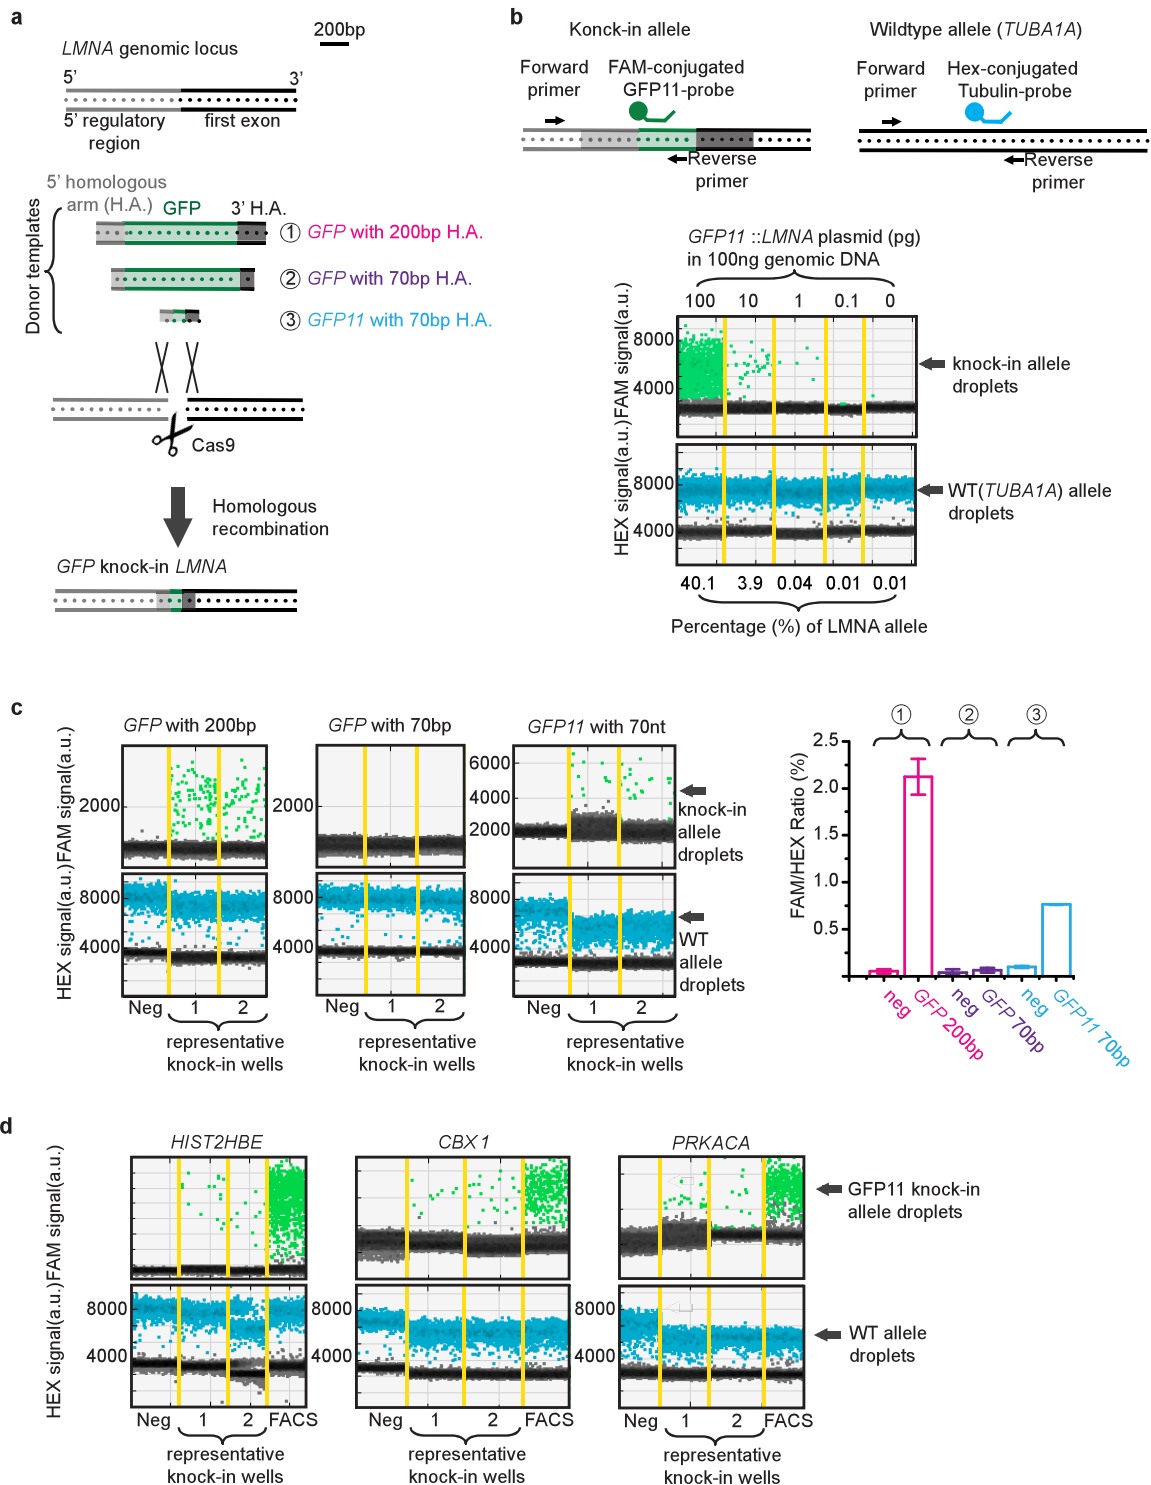

**Supplementary Figure 2: TaqManPCR-ddPCR combined assay for knock-in efficiency.**

(a) Schematic for genetic knock-in via CRISPR/Cas9-mediated homologous recombination. Three different donor templates were used to target the same *LMNA*

genomic locus. In addition to GFP11 with 70 nt homology arms (ssDNA), we also tested full length GFP with 200 bp or 70 bp homology arms (double-strand DNA). **(b)** Schematic of TaqManPCR-ddPCR combined assay to quantify the percentage of knock-in alleles. **(c)** ddPCR with indicated amounts of *GFP11::LMNA* plasmid in 100 ng of genomic DNA. Percentages were calculated by taking concentration ratio of a knock-in-allele-specific FAM probe and a wild-type-allele-specific HEX probe. The result indicates that 70 bp homology arm is too short for efficient knock-in of full length GFP using a dsDNA donor. **(c)** ddPCR for *GFP*- or *GFP11*-knock-in alleles at a *LMNA* gene locus. As a negative control, non-targeting sgRNA was used. Quantified data are shown as a bar graph. **(d)** ddPCR for *GFP11*-knock-in alleles at indicated loci. Quantified data are shown in Figure 2a. After enriching GFP<sup>+</sup> cells by fluorescence-activated cell sorting (FACS), GFP11-knock-in signal was significantly increased in each case. Dots show droplets containing indicated alleles. Yellow lines indicate the borders between samples.

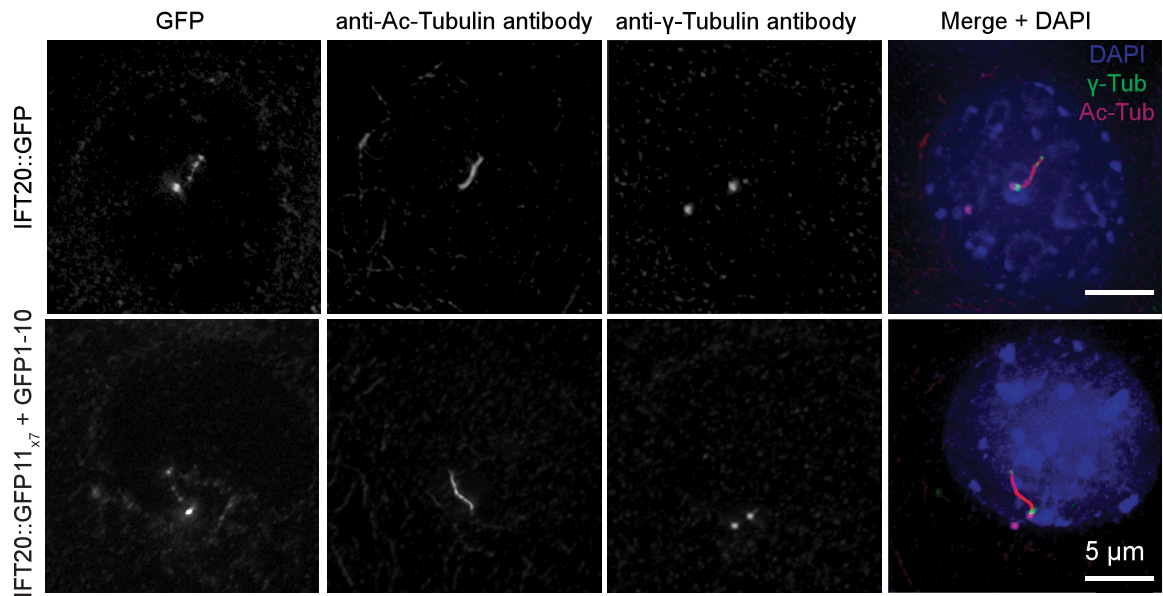

**Supplementary Figure 3.** Images of mouse IMCD3 cells expressing either IFT20::GFP or IFT20::GFP11<sub>x7</sub> + GFP1-10 (see Supplementary Movie 1).

**Supplementary Table 1: Sequence of *GFP1-10* and *sfCherry1-10***

| <b>Sequence</b>                                                                                                                                                                                                                                                                                                                                                                                                                                                                                                                                                                                                                                                                                                                   |
|-----------------------------------------------------------------------------------------------------------------------------------------------------------------------------------------------------------------------------------------------------------------------------------------------------------------------------------------------------------------------------------------------------------------------------------------------------------------------------------------------------------------------------------------------------------------------------------------------------------------------------------------------------------------------------------------------------------------------------------|
| <b><i>GFP1-10</i></b><br>ATGTCCAAAGGAGAAGAAGTGTGTTACCGGTGTTGTGCCAATTTTGGTTGAACTCGATGG<br>TGATGTCAACGGACATAAGTTCTCAGTGAGAGGCGAAGGAGAAGGTGACGCCACCATTG<br>GAAAATTGACTCTTAAATTCATCTGTAATACTGGTAAACTTCTGTACCATGGCCGACT<br>CTCGTAACAACGCTTACGTACGGAGTTCAGTGCTTTTCGAGATACCCAGACCATATGAA<br>AAGACATGACTTTTTTAAGTCCGGCTATGCCTGAAGGTTACGTGCAAGAAAGAACAATTT<br>CGTTCAAAGATGATGGAAAATATAAACTAGAGCAGTTGTTAAATTTGAAGGAGATACT<br>TTGGTTAACCGCATTGAACTGAAAGGAACAGATTTTAAAGAAGATGGTAATATTCTTGG<br>ACACAAACTCGAATACAATTTTAATAGTCATAACGTATAACATCACTGCTGATAAGCAA<br>AGAACGGAATTAAGCGAATTTTACAGTACGCCATAATGTAGAAGATGGCAGTGTTCAA<br>CTTGCCGACCATTACCAACAAAACACCCCTATTGGAGACGGTCCGGTACTTCTTCCTGA<br>TAATCACTACCTCTCAACACAAACAGTCCTGAGCAAAGATCCAAATGAAAA |
| <b><i>sfCherry1-10</i></b><br>ATGGAGGAGGACAACATGGCCATCATCAAGGAGTTCATGAGATTCAAGGTGCACATGGA<br>GGGCAGCGTGAACGGCCACGAGTTCGAGATCGAGGGCGAGGGCGAGGGCCACCCCTACG<br>AGGGCACCCAGACCGCCAAGCTGAAGGTGACCAAGGGCGGCCCCCTGCCCTTCGCCTGG<br>GACATCCTGAGCCCCAGTTCATGTACGGCAGCAAGGCCTACGTGAAGCACCCCGCCGA<br>CATCCCCGACTACCTGAAGCTGAGCTTCCCCGAGGGCTTCACCTGGGAGAGAGTGATGA<br>ACTTCGAGGACGGCGGCGTGGTGACCGTGACCCAGGACAGCAGCCTGCAGGACGGCGAG<br>TTCATCTACAAGGTGAAGCTGCTGGGCACCAACTTCCCAGCGACGGCCCCGTGATGCA<br>GAAGAAGACCATGGGCTGGGAGGCCAGCACCGAGAGAATGTACCCCGAGGACGGCGCCC<br>TGAAGGGCGAGATCAACCAGAGACTGAAGCTGAAGGACGGCGGCCACTACGACGCCGAG<br>GTGAAGACCACCTACAAGGCCAAGAAGCCCGTGCAGCTGCCCGGCGCCTACAACGTGGA<br>CATCAAGCTGGACATCACCAGCCACAACGAGGAC              |

**Supplementary Table 2: Sequences of *GFP11* and *sfCherry11* repeat arrays**

| Name                                            | Sequence                                                                                                                                                                                                                                                                                                                                                                                                                                                                                                                                                                                                                                                                                                 |
|-------------------------------------------------|----------------------------------------------------------------------------------------------------------------------------------------------------------------------------------------------------------------------------------------------------------------------------------------------------------------------------------------------------------------------------------------------------------------------------------------------------------------------------------------------------------------------------------------------------------------------------------------------------------------------------------------------------------------------------------------------------------|
| <i>GFP11</i><br>(10aa linker)                   | ATGCGTGACCACATGGTCCTTCATGAGTATGTAAATGCTGCCGGTATCACCGGGAGTGG<br>TGGGTCCGGCGGGAAATTCATG                                                                                                                                                                                                                                                                                                                                                                                                                                                                                                                                                                                                                    |
| <i>GFP11</i> <sub>x3</sub><br>(15aa linker)     | ATGCGTGACCACATGGTCCTTCATGAGTATGTAAATGCTGCTGGGATTACAGGTGGCGG<br>CGGAAGTGGAGGTGGAGGCTCGGGTGGAGGCAGTTCGCGAGACCATATGGTTCTCCACG<br>AATACGTA AACGCAGCAGGCATCACTGGCGGTGGCGGAAGTGGCGGAGGAGGTTTCGGGC<br>GGAGGCAGTTCGCGTGACCATATGGTCCTCCATGAATATGTAAATGCAGCTGGCATTAC<br>TGGAGGTGGCGGTAGTGGCGGAAAATTCATG                                                                                                                                                                                                                                                                                                                                                                                                            |
| <i>GFP11</i> <sub>x7</sub><br>(15aa linker)     | ATGCGTGACCACATGGTCCTTCATGAGTATGTAAATGCTGCTGGGATTACAGGTGGCTC<br>TGGAAGTTCAGGTGGAGGCTCGGGTGGCGGCAGTTCGAGAGATCATATGGTTCTCCACG<br>AATACGTTAACGCCGCAGGCATCACTGGCAGTGGTGGATCTGGCAGCGGGAGCGGCTCT<br>GGAGGTAGCAGTCGCGACCATATGGTACTACATGAATATGTCAATGCAGCCGGAATAAC<br>CGGATCCGGAAGTGGCTCAAGCGGAGGAGGAAGTAGTGAAGTTCCTCGGGATCACATGG<br>TGCTGCATGAGTATGTGAACGCGGGCGGGTATAACTGGTTCGGGAGGCTCAGGTAGCGGC<br>AGTTCAGGAGGAAGCGGGTCCCAGACCATATGGTGCTTCACGAATACGTAAACGCAGC<br>TGGCATTACTGGGTGAGGAGGTTTCAGGAGGGTCTGGTTCCTGGATCAGGAGGTAGCAGGG<br>ATCACATGGTACTCCATGAGTACGTGAACGCTGCTGGAATCACAGGCGGTAGCAGTGGT<br>GGAAGTAGCGGCAGCGGCGGCAGTAGCTCACGGGACCATATGGTCTGCACGAATATGT<br>CAATGCTGCCGGTATCACCGGGAGTGGTGGGTCCGGCGGGAAATTCATG |
| <i>GFP11</i><br>(5aa linker)                    | ATGCGTGACCACATGGTCCTTCATGAGTATGTAAATGCTGCTGGGATTACAGGTGGCGG<br>CAAATTC                                                                                                                                                                                                                                                                                                                                                                                                                                                                                                                                                                                                                                   |
| <i>GFP11</i> <sub>x7</sub><br>(5aa linker)      | ATGCGTGACCACATGGTCCTTCATGAGTATGTAAATGCTGCTGGGATTACAGGTGGCTC<br>TGGAGGTAGAGATCATATGGTTCTCCACGAATACGTTAACGCCGCAGGCATCACTGGCG<br>GTAGTGGAGGACGCGACCATATGGTACTACATGAATATGTCAATGCAGCCGGAATAACC<br>GGAGGGTCCGGAGGCCGGGATCACATGGTGCTGCATGAGTATGTGAACGCGGCGGGTAT<br>AACTGGTGGGTCCGGCGGACGAGACCATATGGTGCTTCACGAATACGTAAACGCAGCTG<br>GCATTACTGGCGGATCAGGTGGCAGGATCACATGGTACTCCATGAGTACGTGAACGCT<br>GCTGGAATCACAGGCGGTAGCGGCGGTCCGGACCATATGGTCTGCACGAATATGTCAA<br>TGCTGCCGGTATCACCGGCGCAAATTCATG                                                                                                                                                                                                                    |
| <i>sfCherry11</i>                               | ATGTACACCATCGTGGAGCAGTACGAGAGAGCCGAGGGCAGACACAGCACCCGGCGGC                                                                                                                                                                                                                                                                                                                                                                                                                                                                                                                                                                                                                                               |
| <i>sfCherry11</i> <sub>x4</sub><br>(5aa linker) | ATGTACACAATCGTTGAACAGTACGAGAGGGCAGAGGGTAGGCATAGCACAGGTGGAGG<br>GGGCAGTGGCGGCTACACCATCGTCGAGCAATATGAGAGAGCTGAAGGCCGCCACTCTA<br>CAGGTGGAGGAGGTTCTGGTGGGTATACCATCGTTGAACAGTACGAACGCGCTGAGGGC<br>AGGCACTCCACAGGAGGTGGTGGTAGTGGGGGTATACCATCGTCGAGCAGTACGAGCG<br>CGCCGAGGGCAGGCACAGTACCGGTGGTGGAGGATCTGGCGGG                                                                                                                                                                                                                                                                                                                                                                                                   |

GFP11 sequence

sfCherry11 sequence

Linker sequence

Start codon

**Supplementary Table 3: Sequence of *GFP1-10::VP64::NLS***

| Sequence                                                                                                                                                                                                                                                                                                                                                                                                                                                                                                                                                                                                                                                                                                                                                                                                                                                                                                                                  |
|-------------------------------------------------------------------------------------------------------------------------------------------------------------------------------------------------------------------------------------------------------------------------------------------------------------------------------------------------------------------------------------------------------------------------------------------------------------------------------------------------------------------------------------------------------------------------------------------------------------------------------------------------------------------------------------------------------------------------------------------------------------------------------------------------------------------------------------------------------------------------------------------------------------------------------------------|
| <b><i>GFP1-10</i></b> <b><i>VP64</i></b> <b><i>NLS</i></b>                                                                                                                                                                                                                                                                                                                                                                                                                                                                                                                                                                                                                                                                                                                                                                                                                                                                                |
| ATGTCCAAAGGAGAAGAAGTGTACCGGTGTTGTGCCAATTTTGGTTGAACTCGATGG<br>TGATGTCAACGGACATAAGTTCTCAGTGAGAGGCGAAGGAGAAGGTGACGCCACCATTG<br>GAAAATTGACTCTTAAATTCATCTGTACTACTGGTAAACTTCTGTACCATGGCCGACT<br>CTCGTAACAACGCTTACGTACGGAGTTCAGTGCTTTTCGAGATACCCAGACCATATGAA<br>AAGACATGACTTTTTTAAGTCGGCTATGCCTGAAGGTTACGTGCAAGAAAGAACAATTT<br>CGTTCAAAGATGATGGAAAATATAAAACTAGAGCAGTTGTTAAATTTGAAGGAGATACT<br>TTGGTTAACCGCATTGAACTGAAAGGAACAGATTTTAAAGAAGATGGTAATATTCTTGG<br>ACACAAACTCGAATACAATTTAATAGTCATAACGTATACATCACTGCTGATAAGCAA<br>AGAACGGAATTAAGCGAATTTACAGTACGCCATAATGTAGAAGATGGCAGTGTTCAA<br>CTTGCCGACCATTACCAACAAAACACCCCTATTGGAGACGGTCCGGTACTTCTTCTGA<br>TAATCACTACCTCTCAACACAAACAGTCCTGAGCAAAGATCCAAATGAAAAAGTTTAA<br>ACGGTAGTGATGCTTTAGACGATTTTGACTTAGATATGCTTGGTTCAGACGCGTTAGAC<br>GACTTCGACCTAGACATGTTAGGCTCAGATGCATTGGACGACTTCGATTTAGATATGTT<br>GGGCTCCGATGCCCTAGATGACTTTGATCTAGATATGCTAGGTAGTactagtGGTGGCG<br>GCGGAAGTCCCAAGAAGAAGCGCAAGGTGTAA |

**Supplementary Table 4: sgRNA sequences**

| <b>sgRNA target</b>               | <b>DNA sequence</b>               |
|-----------------------------------|-----------------------------------|
| <i>HIST2H2BE</i>                  | GTCCCGGCAGGGACTCACT <b>TGG</b>    |
| <i>CBX1</i>                       | GAAAGCTGGCGGGCACTAT <b>GGG</b>    |
| <i>LMNA</i>                       | GCCATGGAGACCCCGTCCCAG <b>CGG</b>  |
| <i>PRKACA</i>                     | GGCCGCCGCCGCCGCGAT <b>GGG</b>     |
| <i>ERN1</i> (non-targeting sgRNA) | GACTCCAGACGCCCTCTGAGCG <b>AGG</b> |
| <i>CxCR4</i>                      | GCAGACGCGAGGAAGGAGGGCGC           |
| <i>CxCR4</i> (negative control)   | GAACGACTAGTTAGGCGTGTA             |

Guide sequences of 20-25 bases upstream of a PAM sequence (**bold**) were selected.



**Supplementary Table 5: Oligo-nucleotide donor DNA sequences**

| <b>sgRNA target</b>          | <b>DNA sequence</b>                                                                                                                                                                                                     |
|------------------------------|-------------------------------------------------------------------------------------------------------------------------------------------------------------------------------------------------------------------------|
| <i>HIST2H2BE</i><br>(200 nt) | GCCCCGGCGAGCTGGCCAAGCACGCCGTGTCCGAGGGCACCAAGGCGGTACCAAGTACA<br>CCAGCTCCAAGGGTGGCGGCCCGTGACCACATGGTCCTTCATGAGTATGTAAATGCTGCT<br>GGGATTACATGAGTCCCTGCCGGGACCTGGCGCTCGCTCGCTCGAGTCGCCGGCTGCTT<br>GACTCCAAAGGCTCTTTTTTCAGAG |
| <i>CBX1</i><br>(200 nt)      | CTAATGCCCTTTTTATTTTATTTTATCATTTTAGCAGCGTCACCCTTTACACCAGAAAGC<br>TGGCGGGCACTATGCGTGACCACATGGTCCTTCATGAGTATGTAAATGCTGCTGGGATT<br>ACAGGTGGCGGCCGGGAAAAACAACAAGAAGAAAGTGGAGGAGGTGCTAGAAGAGGA<br>GGAAGAGGAATATGTGGTGGAAA     |
| <i>LMNA</i><br>(200 nt)      | TCCTTCGACCCGAGCCCCGCGCCCTTTCCGGGACCCCTGCCCGCGGGCAGCGCTGCCA<br>ACCTGCCGGCCATGCGTGACCACATGGTCCTTCATGAGTATGTAAATGCTGCTGGGATT<br>ACAGGTGGCGGCCGAGACCCCGTCCCAGCGGCGCGCCACCCGCAGCGGGGCGCAGGCCAG<br>CTCCACTCCGCTGTGCCCCACCC    |
| <i>PRKACA</i><br>(200 nt)    | GGGGCCGCCGGCCGCGAGCCAGCACCCGCCGCGCCGCGAGCTCCGGGACCGGCCCGGCCG<br>CCGCCCGCGCATGCGTGACCACATGGTCCTTCATGAGTATGTAAATGCTGCTGGGATT<br>ACAGGTGGCGGCCGGCAACGCCGCCGCCCAAGAAGGGCAGCGAGCAGGAGAGCGGTGA<br>GTGCCCGGGCTGTGACCCCGATC     |

GFP11x1 sequence

Linker sequence

Regulatory region sequence

Coding region sequence

Start or stop codon

**Supplementary Table 6: TaqMan probes and primers for ddPCR**

|                                    | <b>Forward primer</b>      | <b>GFP11-specific<br/>FAM-probe</b> | <b>GFP11-specific<br/>Reverse primer</b> |
|------------------------------------|----------------------------|-------------------------------------|------------------------------------------|
| <i>HIST2H2BE</i><br><i>::GFP11</i> | CAAGCGCTCCACCAT<br>CACAT   | TGAAGGACCATGTGGTCACG<br>GC          | CCCAGCAGCATTACATA<br>CTCA                |
| <i>GFP11::CBX1</i>                 | TCCCTGGTTTTCTTA<br>CCATCCA | ATGCGTGACCACATGGTCCT<br>TCAT        | CCTGTAATCCCAGCAGCA<br>TTTA               |
| <i>GFP11::LMNA</i>                 | GGACCTATTAGAGCC<br>TTTGCC  | ATGCGTGACCACATGGTCCT<br>TCAT        | CCTGTAATCCCAGCAGCA<br>TTTA               |
| <i>GFP11::<br/>PRKACA</i>          | CAGCGGCAGAGATCT<br>TGGG    | ATGCGTGACCACATGGTCCT<br>TCAT        | CCTGTAATCCCAGCAGCA<br>TTTA               |

|                   | <b>Forward primer</b>     | <b>EGFP-specific<br/>FAM-probe</b> | <b>EGFP-specific<br/>Reverse primer</b> |
|-------------------|---------------------------|------------------------------------|-----------------------------------------|
| <i>EGFP::LMNA</i> | GGACCTATTAGAGCC<br>TTTGCC | ATGGTGAGCAAGGGCGAGGA               | TCCAGCTCGACCAGGATG                      |

|                                       | <b>Forward primer</b>  | <b>Wild-type allele specific<br/>HEX-probe</b> | <b>Reverse primer</b> |
|---------------------------------------|------------------------|------------------------------------------------|-----------------------|
| Wild-type allele<br>( <i>TUBA1A</i> ) | GCGTGAGTGCATCTC<br>CAT | CTCTACTGCCTGGAACACGG<br>CATC                   | ACTTGGCATCTGGCCATC    |
